# Supplementary material
Source: PubMed Central journal article supplement (PMC2884042)
Supplement: NIHMS200695-supplement-1_si_001.pdf [file NIHMS200695-supplement-1_si_001.pdf]

Supporting Information for:

# Label-free Fluorescent Functional DNA Sensors Using Unmodified DNA: A Vacant Site Approach

*Yu Xiang,<sup>1</sup> Zidong Wang,<sup>2</sup> Hang Xing,<sup>1</sup> Ngo Yin Wong,<sup>2</sup> and Yi Lu<sup>\*,1,2</sup>*

<sup>1</sup>Department of Chemistry and <sup>2</sup>Department of Material Science and Engineering,

University of Illinois at Urbana-Champaign, Urbana, IL 61801, USA

\*To whom correspondence should be addressed: [yi-lu@illinois.edu](mailto:yi-lu@illinois.edu)

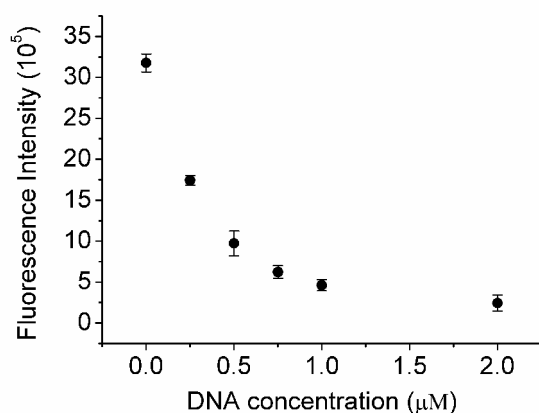

**Figure S1.** Fluorescence titration of 0.75  $\mu\text{M}$  ATMND with different amounts of 17S<sub>va</sub>/17E<sub>va</sub> duplex containing a vacant site in buffer A. The binding constant  $K_a$  is calculated to be more than  $10^6 \text{ M}^{-1}$  according to the 1:1 binding mode, and the fluorescence intensity for each data point was found to be stable at least in one week (within 10% derivation).

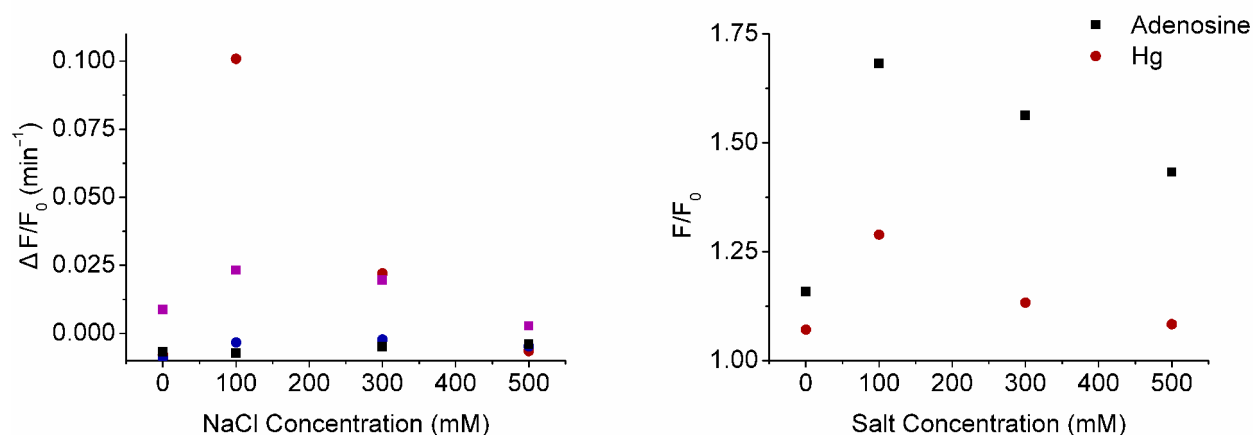

**Figure S2.** Effect of salt concentration on the performance of DNAzyme (left) and aptamer (right) based sensors in this work. Left: red dots, ATMND/17S<sub>va</sub>/17E<sub>va</sub> in the presence of 200 nM Pb<sup>2+</sup>; blue dots, ATMND/17S<sub>va</sub>/17E<sub>va</sub> in the absence of Pb<sup>2+</sup>; pink squares: ATMND/39S<sub>va</sub>/39E<sub>va</sub> in the presence of 100 nM UO<sub>2</sub><sup>2+</sup>; black squares: ATMND/39S<sub>va</sub>/39E<sub>va</sub> in the absence of UO<sub>2</sub><sup>2+</sup>. Right: black squares, ATMND/AdAP<sub>va</sub>/AdL1<sub>va</sub> in the presence of 125  $\mu\text{M}$  adenosine; red dots, ATMND/HgAP<sub>va</sub>/HgL<sub>va</sub> in the presence of 500 nM Hg<sup>2+</sup>. The salt for Hg<sup>2+</sup> sensor was NaNO<sub>3</sub>, while others were NaCl. The pH was fixed at the values of buffer A~D, respectively.

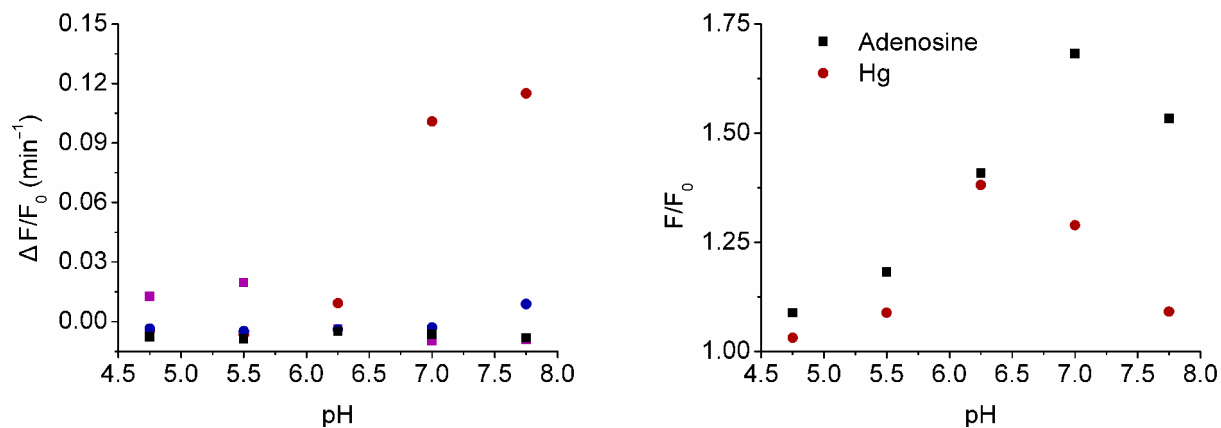

**Figure S3.** Effect of pH on the performance of DNAzyme (left) and aptamer (right) based sensors in this work. Left: red dots, ATMND/17S<sub>va</sub>/17E<sub>va</sub> in the presence of 200 nM Pb<sup>2+</sup>; blue dots, ATMND/17S<sub>va</sub>/17E<sub>va</sub> in the absence of Pb<sup>2+</sup>; pink squares: ATMND/39S<sub>va</sub>/39E<sub>va</sub> in the presence of 100 nM UO<sub>2</sub><sup>2+</sup>; black squares: ATMND/39S<sub>va</sub>/39E<sub>va</sub> in the absence of UO<sub>2</sub><sup>2+</sup>. Right: black squares, ATMND/AdAP<sub>va</sub>/AdL1<sub>va</sub> in the presence of 125 μM adenosine; red dots, ATMND/HgAP<sub>va</sub>/HgL<sub>va</sub> in the presence of 500 nM Hg<sup>2+</sup>. The pH of 4.75 and 5.5 were adjusted by MES while 7.0 and 7.75 were by HEPES. The pH of 6.25 was checked using both MES and HEPES and the results were similar. Salt concentration was fixed at 100 mM.

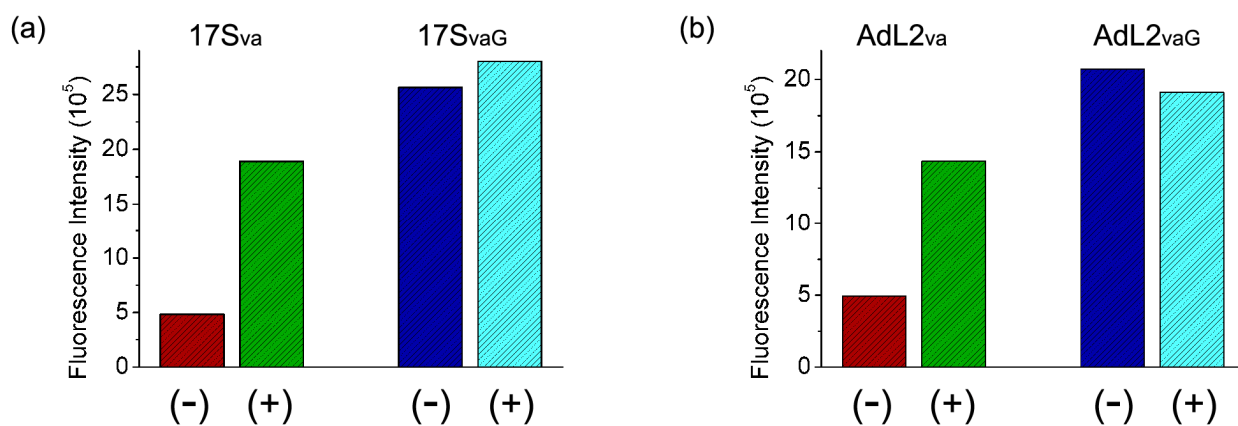

**Figure S4.** Effect of vacant site on the response of (a) ATMND/17S<sub>va</sub>(17S<sub>va</sub>G)/17E<sub>va</sub> to Pb<sup>2+</sup>, and (b) ATMND/AdAP<sub>va</sub>/AdL2<sub>va</sub>(AdL2<sub>va</sub>G) to adenosine. (-) and (+): in the absence and presence of (a) 1 μM Pb<sup>2+</sup> or (b) 200 μM adenosine, respectively.

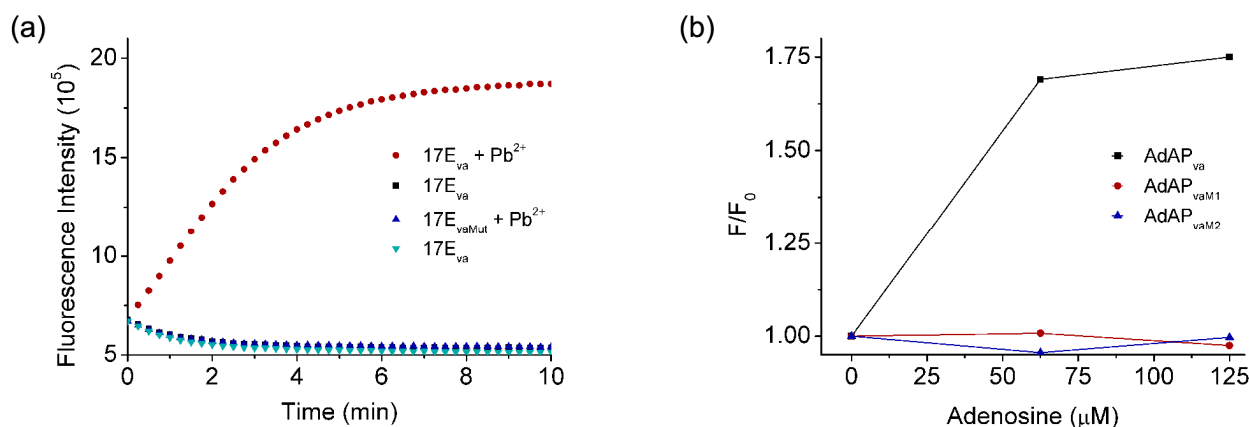

**Figure S5.** (a) Response of 17E<sub>va</sub> and its inactive mutant 17E<sub>vaMut</sub> to Pb<sup>2+</sup> in the presence of 17S<sub>va</sub> and ATMND. (b) Response of AdAP<sub>va</sub> and its inactive mutants AdAP<sub>vaM1</sub> and AdAP<sub>vaM2</sub> to adenosine in the presence of AdL1<sub>va</sub> and ATMND.

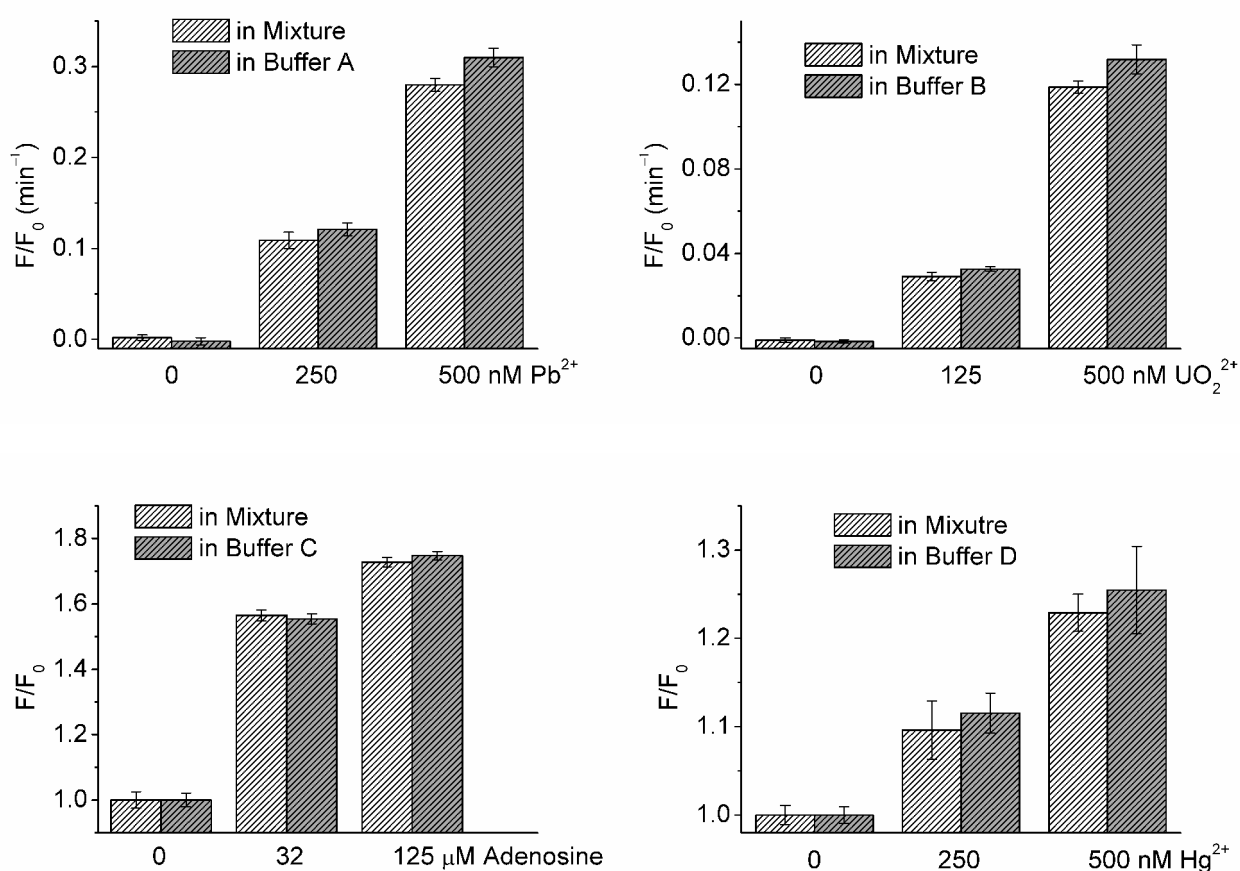

**Figure S6.** Comparison of the sensor responses in buffer and mixture to evaluate the selectivity and immunity to matrix effect. For the four sensors, 1 μM Cd<sup>2+</sup>, Fe<sup>2+</sup>, Ni<sup>2+</sup>, Co<sup>2+</sup>, Ca<sup>2+</sup> and Mg<sup>2+</sup> were added to the buffer as mixture. In addition, 500 nM UO<sub>2</sub><sup>2+</sup> and Hg<sup>2+</sup> were added to the mixture for Pb<sup>2+</sup> sensor; 500 nM Pb<sup>2+</sup> and Hg<sup>2+</sup> were added to the mixture for UO<sub>2</sub><sup>2+</sup> sensor; 500 nM Pb<sup>2+</sup> and UO<sub>2</sub><sup>2+</sup>; 500 nM Pb<sup>2+</sup>, UO<sub>2</sub><sup>2+</sup>, Hg<sup>2+</sup> and 500 μM cytidine, uridine were added to the mixture for adenosine sensor.

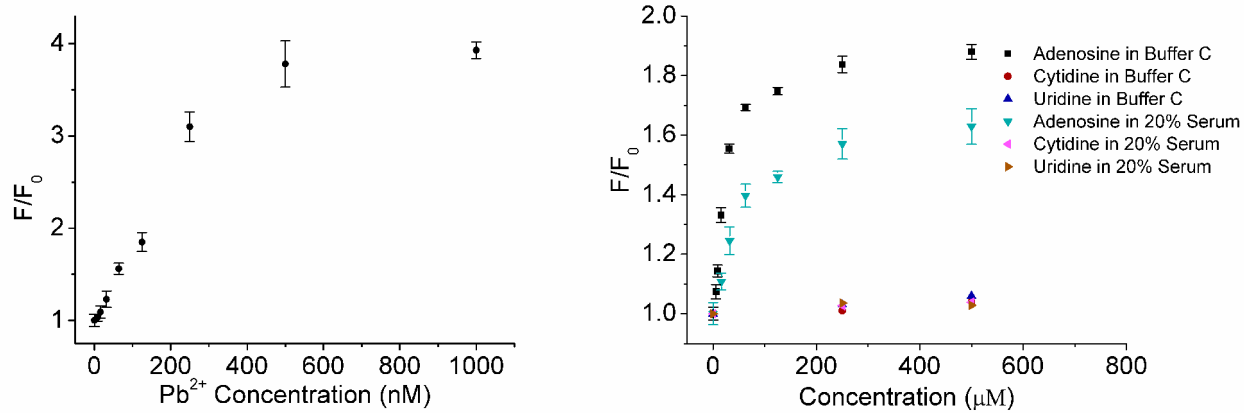

**Figure S7.** Calibration curves for quantification of  $Pb^{2+}$  (left) and adenosine (right, light blue) in drinking water and human serum, respectively.
